# Supplementary material for: Crystal Structure of Mouse Thymidylate Synthase in Tertiary Complex with dUMP and Raltitrexed Reveals N-Terminus Architecture and Two Different Active Site Conformations
Source: Hindawi journal article supplement (doi:10.1155/2014/945803), 2014-01-01
Supplement: f1 [file 945803.f1.pdf]

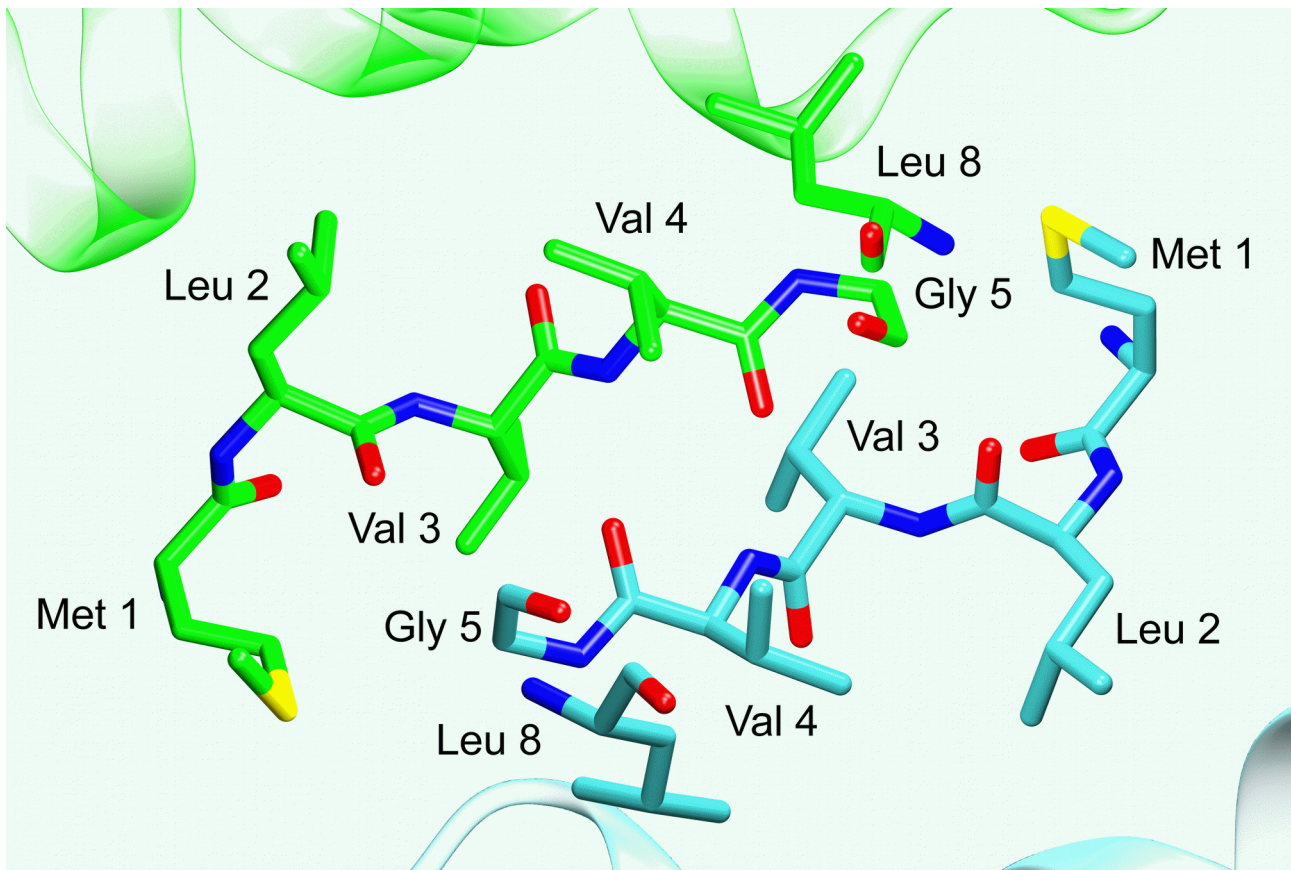

**Fig. 1S.** Two antiparallel arrays of N-terminal non-polar residues stabilizing the molecular crystal packing of the mTS-dUMP-Raltitrexed complex structure.
